# Supplementary figures and images for: Stimulation of Heme-Dependent Catalase Enhanced the Cytoprotective Effect of Lactobacillus plantarum against Oxidative Stress
Source: MDPI journal article supplement (doi:10.3390/applmicrobiol3010011), 2023-01-23

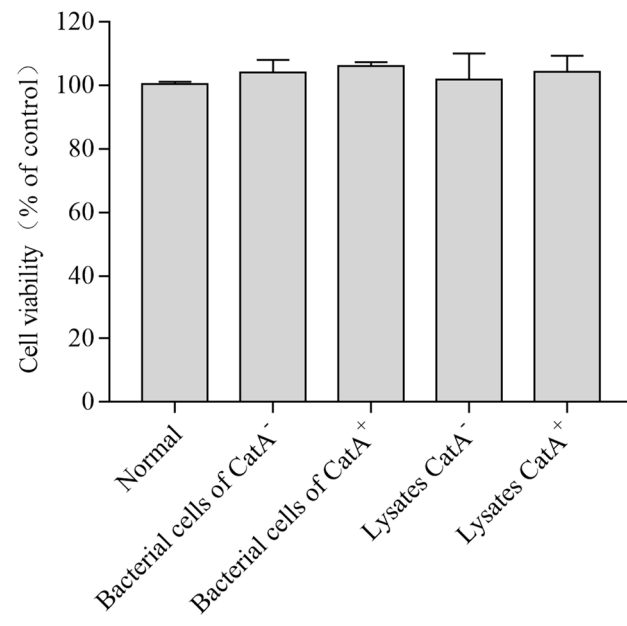

Supplement: s1 [file s1]
